# Supplementary material for: AGE IS ASSOCIATED WITH INCREASED EXPRESSION OF PATTERN RECOGNITION RECEPTOR GENES AND ACE2, THE RECEPTOR FOR SARS-COV-2: IMPLICATIONS FOR THE EPIDEMIOLOGY OF COVID-19 DISEASE
Source: bioRxiv or medRxiv preprint supplement (doi:10.1101/2020.06.15.134403), 2020-06-16

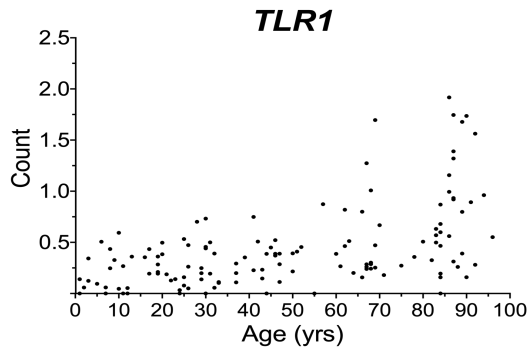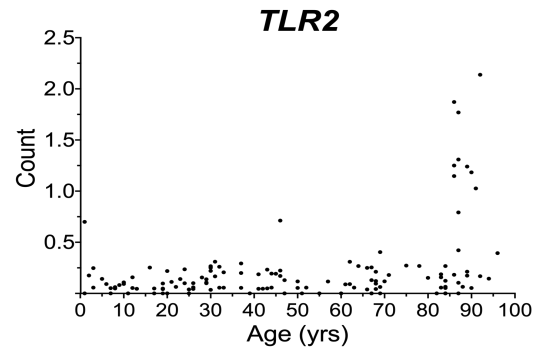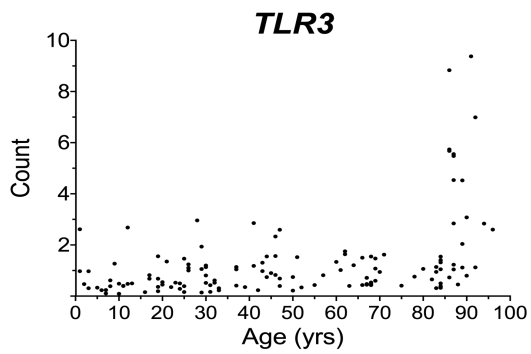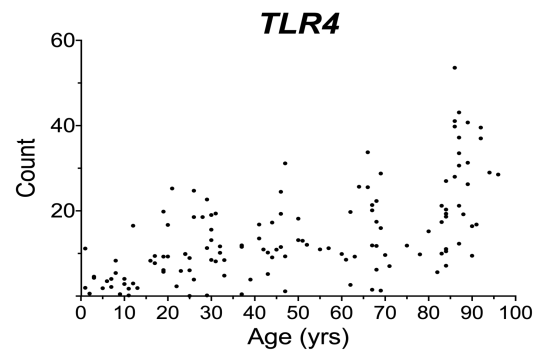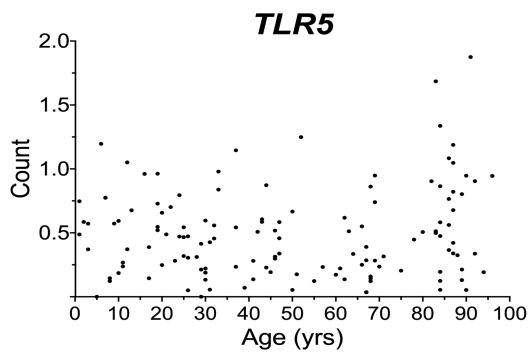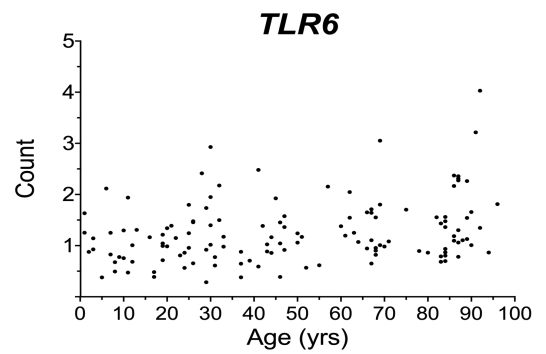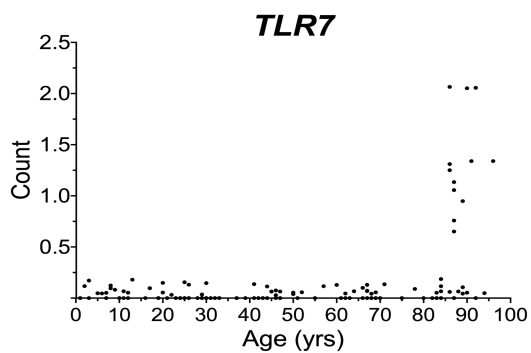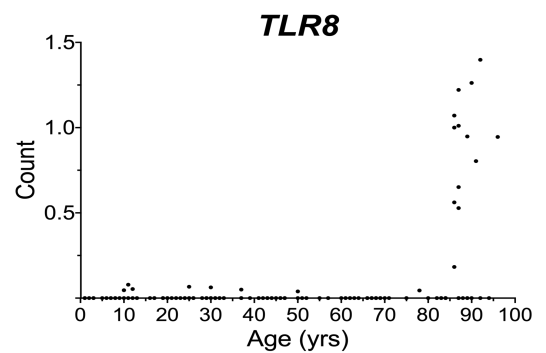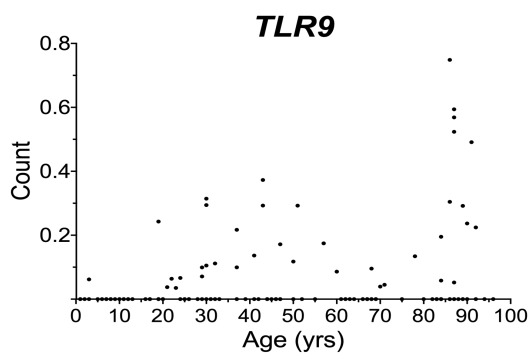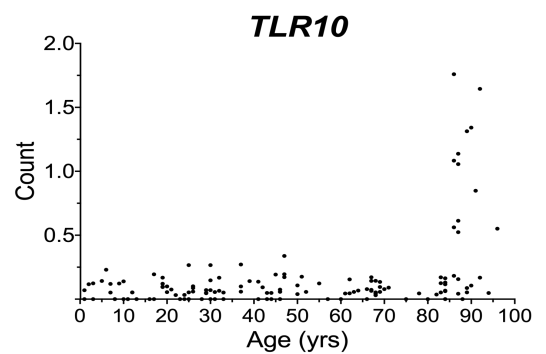

Supplement: Supplementary file [file media-4.pdf]
